# Supplementary material for: Probing the ionotropic activity of glutamate GluD2 receptor in HEK cells with genetically-engineered photopharmacology
Source: eLife. 2020 Oct 28;9:e59026. doi: 10.7554/eLife.59026 (PMC7679134; doi:10.7554/eLife.59026)
Supplement: Figure 2—source data 1. [file elife-59026-fig2-data1.xlsx]

## Sheet: Figure 2A
A654T ctrl	A654T penta		WT ctrl	WT penta
-770.335	-209.238		-70.3903	-89.85
-385.284	-152.382		-38.1028	-41.0106
-869.972	-127.272		-71.8215	-77.2288
-515.413	-79.02		-95.6082	-90.0091
-368.753	-79.7152		-85.0068	-79.9304
-351.273	-128.727		-46.3679	-52.9528
-543.505	-129.392		-67.8829	-71.8303	Mean
91.5327	19.9282		9.00642	8.27878	SEM
6	6		6	6	N
0.1152	0.4515		0.6973	0.1962	Normality test shapiro
					Var.test A654T ctrl - A654T penta	0.004506	false
					Var.test WT ctrl - WT penta	0.8578	true
					Var.test A654T ctrl - WT ctrl	9.682e-05	false
					paired t-test A654T ctrl - A654T penta (var=false)	0.004518
					paired t-test WT ctrl - WT penta (var =true)	0.3415
					t-test A654T-WT (var=false)	0.003359

## Sheet: Figure 2B
A654T	T657C	I658C	R660C	I661C	E662C	S663C	I655C	Q666C	S667C	Q669C	D670C	K673C	Q674C	D676C	I677C
1.00624	0.983733	1.00154	1.00323	1.00012	0.996644	1.00785	0.999499	1.10995	0.995667	0.99863	1.00115	0.999083	1.04702	0.996626	1.39661
0.99022	0.998645	1.00464	0.972242	1.18129	1.02038	0.996976	0.994385	1.0835	0.98463	0.9935	1.06945	1.00132	1.07325	0.998827	1.46965
1.002	0.998296	1.0058	0.988436	1.02056	0.996887	1.00332	1.00046	1.07208	1.00831	1.0052	1.0277	0.997866	1.06499	1.00089	1.42754
0.981088	1.01688	1.00652	1.00431	1.01029		0.994046	0.980803	1.16943	1.0105	0.991698	1.05921	0.990435	1.10077	0.996905	1.39363
0.986779			1.02337	1.00357		1.006	0.997741		0.991204	0.983186	1.06177	0.996914	1.08099	0.997572	1.28846
			1.09963	1.00948			1.00734			0.979262					1.52782
				1.03659											1.21099
															1.60823
0.993267	0.99939	1.00462	1.0152	1.03742	1.00464	1.00164	0.996705	1.10874	0.998062	0.991913	1.05453	0.997124	1.07341	0.998164	1.41536	Mean
0.0047137	0.00678817	0.00110001	0.0182739	0.0244159	0.00787124	0.0026443	0.00362572	0.021728	0.00496421	0.00391796	0.00920407	0.00182749	0.00886996	0.000780529	0.0446489	SEM
5	4	4	6	7	3	5	6	4	5	6	5	5	5	5	8	N
0.6365	0.6763	0.4431	0.1336	0.0004497	0.01696	0.5426	0.4239	0.4182	0.5456	0.9152	0.1782	0.4171	0.9959	0.3747	0.9727	Normality test shapiro
0.2264	0.934	0.02457	0.4434	0.1763	0.6155	0.569	0.4051	0.01535	0.7162	0.09395	0.009607	0.1906	0.001164	0.07836	3.438e-05	one-sample t-test (different from 1)
1	1	0.39312	1	1	1	1	1	0.2456	1	1	0.153712	1	0.018624	1	0.0005504	t-test correction bonferroni
1	1	0.29484	1	1	1	1	1	0.19955	1	0.9395	0.134498	1	0.01746	0.86196	0.0005504	t-test correction Holm
				0.01563	1											Wilcox (different from 1)

## Sheet: Figure 2C
A654T	Q666C	Q669C	D670C	K673C	Q674C	D676C	I677C
2.53385	9.15262	-0.836825	9.97892	-0.255401	28.0071	1.86581	32.1384
2.65796	11.7043	-3.09289	13.9012	0.610496	13.9864	0.652161	44.2842
0.259489	23.0227	-0.631047	17.6317	0.659522	9.86436	-1.36145	48.4352
-1.76764	18.1578	-3.18568	16.8816	-5.09279	18.4175	1.18194	35.7346
-1.79338	NA	-1.87711	NA	-0.604356	32.4289	-0.359885	69.4438
NA	NA	-1.63426	NA	NA	NA	NA	35.7913
NA	NA	NA	NA	NA	NA	NA	50.5425
NA	NA	NA	NA	NA	NA	NA	53.8131
0.378056	15.5093	-1.8763	14.5984	-0.936505	20.5408	0.395713	46.2729	Mean
0.97925	3.14048	0.442882	1.7378	1.06746	4.23396	0.570248	4.31217	SEM
5	4	6	5	5	5	5	8	N
0.1462	0.7188	0.3558	0.5038	0.02591	0.6829	0.9014	0.5098	Normality test shapiro
0.7191	0.01592	0.008196	0.003539	0.4298	0.008331	0.5259	1.341e-05	t-test (different from 0)
1	0.12736	0.065568	0.028312	1	0.066648	1	0.0001072	t-test correction bonferroni
1	0.06368	0.049176	0.024773	1	0.049176	1	0.0001072	t-test correction Holm
