# Supplementary material for: Probing the ionotropic activity of glutamate GluD2 receptor in HEK cells with genetically-engineered photopharmacology
Source: eLife. 2020 Oct 28;9:e59026. doi: 10.7554/eLife.59026 (PMC7679134; doi:10.7554/eLife.59026)
Supplement: Figure 3—source data 1. [file elife-59026-fig3-data1.xlsx]

## Sheet: Fig3A
percent block penta /NMDG	percent block trans MAGu/NMDG
93.1397	29.9337
80.8738	35.8143
74.2555	35.9658
80.1431	28.6388
53.691	37.2851
93.0931	33.3192
40.4122	20.4253
79.9299	43.0128
74.4423	33.0494	Mean
6.53305	2.39777	SEM

## Sheet: Fig 3C
%10ms	%50ms	%100ms	%200 ms
16.7824	38.4006	60.2576	65.7674
31.7463	73.1553	128.658	133.982
16.9791	38.0061	79.172	93.156
27.1449	64.6065	101.317	109.273
20.9178	51.7765	85.1535	91.7708
20.6995	48.037	87.7383	98.1822
24.1459	54.251	90.3109	93.7673
24.699	66.9673	97.6398	100.801
22.8894	54.4	91.2809	98.3375	Mean
1.80435	4.60203	6.94149	6.74519	SEM
							Formula: y ~ (a * exp(-beta * x))
							Parameters
								Estimate	Std. Error	t value	Pr(>|t|)
					current trace		a	0.997457	0.005329	187.2	<2e-16
							b	0.029567	0.000225	131.4	<2e-16

## Sheet: Fig 3D
380	dark
100	89.5094
100	80.281
100	100.778
100	87.0391
100	78.45
100	82.5439
100	93.6046
100	77.4678
100	85.8758
100	86.1722	Mean
0	2.5381	SEM
9	9	N
	0.5935	Normality test shapiro
		Var test	< 2.2e-16	false
		paired t-test	0.0006101
