# Supplementary material for: Probing the ionotropic activity of glutamate GluD2 receptor in HEK cells with genetically-engineered photopharmacology
Source: eLife. 2020 Oct 28;9:e59026. doi: 10.7554/eLife.59026 (PMC7679134; doi:10.7554/eLife.59026)
Supplement: Figure 4—source data 1. [file elife-59026-fig4-data1.xlsx]

## Sheet: Fig4A
Vm mean	I UV mean	I UV sem	I VIS mean	I VIS sem	subtracted
-119.752	-1545.96	134.692	-1147.41	96.7265	-398.543
-119.176	-1504.08	136.899	-1103.38	97.5609	-400.704
-118.589	-1488.35	136.503	-1086.93	97.2301	-401.415
-117.981	-1475.87	136.006	-1077.82	96.4622	-398.052
-117.386	-1463.31	135.042	-1067.89	96.6332	-395.426
-116.712	-1453.31	134.104	-1059.48	96.3721	-393.832
-116.153	-1441.91	133.353	-1047.48	95.7467	-394.435
-115.571	-1431.46	132.17	-1040.57	95.295	-390.889
-114.967	-1421.3	131.554	-1032.84	94.3976	-388.463
-114.377	-1410.24	131.345	-1027.94	93.4995	-382.299
-113.778	-1403.53	130.655	-1020.39	93.7699	-383.139
-113.182	-1391.49	129.506	-1014.87	93.3116	-376.628
-112.571	-1382.43	129.075	-1005.43	92.7923	-377
-111.982	-1373.06	128.16	-999.565	91.6568	-373.492
-111.356	-1364.98	127.32	-988.611	91.9076	-376.365
-110.796	-1356.16	126.772	-984.637	91.0049	-371.523
-110.18	-1344.44	126.063	-978.532	90.1259	-365.905
-109.549	-1336.89	125.65	-970.248	89.7813	-366.643
-108.993	-1327.74	124.663	-962.094	89.5871	-365.645
-108.37	-1318.83	123.949	-955.68	88.9974	-363.153
-107.744	-1309.71	122.986	-949.392	88.1946	-360.317
-107.168	-1302.06	122.914	-945.193	87.3461	-356.864
-106.53	-1291.39	122.05	-935.776	87.6378	-355.614
-105.98	-1282.8	121.137	-931.518	86.4329	-351.282
-105.372	-1271.28	120.181	-922.729	86.2938	-348.555
-104.762	-1264.01	119.263	-918.836	85.9174	-345.173
-104.178	-1257.37	118.961	-912.346	85.5706	-345.028
-103.565	-1248.1	117.938	-901.98	84.5482	-346.121
-102.967	-1240.98	116.911	-895.913	83.7892	-345.067
-102.352	-1231.95	116.539	-890.542	83.7975	-341.407
-101.762	-1221.32	115.876	-885.544	83.4939	-335.78
-101.179	-1213.48	114.858	-880.96	82.6924	-332.523
-100.582	-1204.39	113.619	-873.339	82.2804	-331.056
-99.9783	-1196.31	113.22	-866.615	81.8693	-329.692
-99.3774	-1188.07	112.755	-862.507	81.1521	-325.561
-98.7615	-1179.73	112.148	-853.805	80.8236	-325.921
-98.1821	-1170.66	111.109	-849.492	80.0958	-321.164
-97.558	-1162.59	110.375	-842.516	80.5146	-320.072
-96.9868	-1153.56	110.151	-835.984	79.286	-317.573
-96.3855	-1144.26	109.12	-829.827	78.3592	-314.437
-95.763	-1136.85	108.481	-825.221	77.8956	-311.624
-95.1648	-1128.45	107.829	-819.894	78.2306	-308.554
-94.6002	-1119.65	106.729	-812.846	77.2541	-306.807
-94.0035	-1110.44	105.889	-807.64	76.8279	-302.801
-93.3846	-1101.97	105.442	-802.444	76.5826	-299.526
-92.7558	-1094.28	104.829	-795.308	75.8978	-298.974
-92.194	-1086.94	104.212	-788.773	75.4301	-298.171
-91.5969	-1077.82	103.277	-784.646	74.8952	-293.171
-90.9956	-1069.31	102.445	-776.44	74.5077	-292.867
-90.3813	-1061.88	101.777	-772.295	73.7194	-289.582
-89.7858	-1056.44	101.379	-766.776	72.9838	-289.665
-89.2134	-1046.93	101.081	-759.085	73.1469	-287.84
-88.5929	-1037.15	99.6303	-754.612	73.084	-282.535
-87.9896	-1028.62	99.1537	-748.772	72.4503	-279.847
-87.3816	-1019.24	98.3753	-741.814	71.9598	-277.424
-86.7779	-1010.99	97.7394	-736.375	71.365	-274.618
-86.1715	-1003.67	96.9294	-728.892	71.6184	-274.773
-85.5772	-996.374	96.0843	-722.12	70.2249	-274.254
-84.9746	-988.354	95.5392	-719.44	69.4486	-268.914
-84.3842	-978.999	94.8321	-712.431	68.7272	-266.568
-83.7895	-972.607	94.1589	-705.774	68.2659	-266.833
-83.1886	-964.845	93.5229	-702.074	68.1567	-262.771
-82.5931	-956.88	92.5794	-695.424	67.7261	-261.456
-82.0054	-949.171	91.9692	-688.28	67.5761	-260.891
-81.3884	-942.033	91.3884	-684.652	67.1145	-257.382
-80.7742	-933.177	90.4321	-679.269	66.4818	-253.908
-80.1587	-926.08	89.4384	-674.463	65.8966	-251.617
-79.5742	-918.791	88.4512	-667.353	65.1652	-251.439
-78.9779	-908.804	88.1395	-660.98	64.764	-247.824
-78.3731	-901.738	87.2987	-655.481	64.6415	-246.257
-77.7987	-892.912	86.7938	-648.904	63.8711	-244.008
-77.2016	-885.744	85.642	-642.629	62.7848	-243.115
-76.5936	-878.122	85.1827	-638.515	62.7394	-239.607
-75.9794	-869.69	84.3348	-634.783	62.216	-234.907
-75.3757	-861.505	83.7976	-627.64	61.2749	-233.865
-74.7802	-854.962	83.3345	-621.395	60.6371	-233.568
-74.1781	-847.713	82.236	-617.59	60.566	-230.123
-73.6088	-839.906	81.886	-610.663	60.3082	-229.244
-72.9863	-831.673	81.2519	-604.133	59.7651	-227.539
-72.3842	-822.447	80.1066	-598.111	58.6441	-224.336
-71.7687	-815.781	79.5143	-590.708	58.2389	-225.072
-71.1729	-808.023	78.3837	-589.294	57.8949	-218.729
-70.6212	-799.437	78.1816	-583.557	57.4161	-215.88
-69.9831	-792.766	77.1525	-577.736	56.9573	-215.03
-69.3751	-785.306	76.759	-571.652	56.3561	-213.653
-68.8011	-776.212	75.9868	-566.797	55.8898	-209.414
-68.1634	-768.277	75.3992	-559.95	55.5604	-208.327
-67.5992	-762.054	74.4479	-555.012	54.8401	-207.043
-66.9935	-751.483	73.548	-549.574	54.7154	-201.91
-66.3679	-744.55	73.2766	-543.977	53.8475	-200.572
-65.772	-737.949	72.4713	-538.079	53.6765	-199.87
-65.2004	-728.952	71.653	-532.713	52.7707	-196.239
-64.5662	-722.229	71.1779	-525.433	52.9069	-196.796
-63.9793	-714.767	70.0014	-519.74	52.2371	-195.027
-63.3545	-706.334	69.8412	-515.006	51.6112	-191.328
-62.7985	-699.15	68.6584	-509.386	50.991	-189.764
-62.2222	-693.559	68.2841	-505.371	50.4955	-188.188
-61.6095	-683.614	67.3236	-499.686	49.8613	-183.927
-61.023	-674.701	66.4661	-492.863	49.6688	-181.838
-60.3935	-667.696	65.8241	-487.165	49.2848	-180.53
-59.8465	-659.93	64.8885	-483.404	48.5654	-176.526
-59.1916	-653.049	64.5049	-477.491	48.2549	-175.558
-58.6024	-645.253	63.9259	-473.665	47.3174	-171.588
-58.0061	-638.919	63.2712	-465.458	46.9402	-173.461
-57.377	-630.711	62.5917	-460.69	46.6529	-170.021
-56.767	-622.729	61.697	-454.44	46.1613	-168.289
-56.2036	-614.491	61.3318	-449.373	45.8564	-165.118
-55.6163	-608.212	60.2778	-445.743	45.0599	-162.47
-55.0036	-600.958	60.0149	-440.656	44.7345	-160.302
-54.4085	-591.956	59.2018	-435.131	44.3694	-156.824
-53.7966	-584.361	58.6475	-428.165	43.7987	-156.197
-53.2129	-577.287	57.6015	-424.757	43.3251	-152.531
-52.5544	-568.686	57.1253	-418.803	42.7097	-149.883
-52.0113	-562.085	56.2271	-413.435	42.3026	-148.65
-51.3943	-553.697	55.5054	-407.433	41.6489	-146.264
-50.7801	-546.828	54.7126	-400.968	41.2583	-145.86
-50.2045	-539.619	54.0688	-396.468	40.7625	-143.151
-49.6235	-532.106	53.6385	-391.5	40.3049	-140.606
-49.005	-523.103	52.618	-385.561	39.8643	-137.543
-48.3762	-517.368	51.9086	-380.162	39.5496	-137.206
-47.8097	-510.371	51.2519	-374.696	39.1075	-135.675
-47.2181	-502.365	50.6754	-368.939	38.4147	-133.426
-46.5976	-494.502	49.8882	-363.018	37.5354	-131.484
-46.0322	-487.976	49.1457	-359.546	37.5726	-128.43
-45.4023	-480.467	48.4975	-353.954	36.3764	-126.513
-44.8245	-472.626	47.762	-347.919	36.0965	-124.706
-44.2047	-465.733	47.226	-342.977	35.3309	-122.756
-43.6261	-457.751	46.5788	-338.578	34.924	-119.173
-43.0231	-449.893	45.6542	-332.588	34.3502	-117.305
-42.3471	-442.57	44.9173	-327.55	33.8571	-115.021
-41.806	-436.131	44.3902	-321.989	33.4184	-114.142
-41.1706	-428.009	43.6126	-315.723	33.2722	-112.286
-40.6076	-421.289	43.1457	-310.06	32.6936	-111.229
-40.0289	-414.465	42.1783	-304.698	32.2582	-109.768
-39.3747	-408.366	41.4559	-299.946	31.577	-108.421
-38.8058	-399.948	40.7994	-294.583	31.2878	-105.365
-38.2471	-392.54	40.0624	-288.413	30.9971	-104.127
-37.5538	-383.752	39.3745	-283.284	30.58	-100.468
-37.0276	-377.132	38.6893	-278.666	29.9888	-98.4655
-36.3887	-371.188	38.0085	-274.061	29.2187	-97.1274
-35.8034	-362.527	37.1637	-269.711	28.8096	-92.816
-35.2071	-357.103	36.764	-263.166	28.0543	-93.9368
-34.6429	-350.183	35.9919	-258.426	27.9895	-91.7573
-33.9841	-342.993	35.4609	-251.763	27.3978	-91.2304
-33.4003	-335.362	34.6903	-246.495	26.7616	-88.8674
-32.7927	-327.856	33.9073	-242.063	26.3363	-85.7939
-32.2105	-321.445	33.4339	-236.973	25.7533	-84.4713
-31.5955	-314.235	32.6813	-231.739	25.495	-82.4961
-31.0332	-306.81	32.0172	-226.9	24.5685	-79.9103
-30.4151	-299.847	31.1841	-222.302	24.2999	-77.5457
-29.8423	-292.426	30.7986	-216.845	23.9371	-75.5807
-29.2229	-286.081	29.6112	-211.603	23.4915	-74.4779
-28.6259	-279.605	29.4865	-205.738	22.8422	-73.8672
-28.0398	-273.138	28.8871	-200.92	22.4622	-72.218
-27.3927	-266.232	28.1349	-195.42	22.3141	-70.8123
-26.7991	-258.177	27.4037	-190.752	21.8506	-67.4249
-26.2416	-251.472	26.7892	-186.012	20.9869	-65.4606
-25.6183	-244.659	26.0217	-182.016	20.8303	-62.6439
-25.0201	-238.437	25.3541	-174.159	20.1019	-64.2774
-24.4387	-230.603	25.2005	-170.624	19.9317	-59.9792
-23.8029	-224.174	24.1494	-167.922	19.1407	-56.2523
-23.2082	-216.53	23.535	-161.198	18.678	-55.3316
-22.6519	-209.947	22.9674	-156.401	18.5009	-53.5461
-21.9813	-203.574	22.1384	-151.264	18.1312	-52.3096
-21.3971	-198.407	21.7248	-145.915	17.5207	-52.4923
-20.822	-189.473	21.127	-141.198	16.9531	-48.2754
-20.257	-184.257	20.7265	-137.592	16.505	-46.6654
-19.6162	-176.811	19.5995	-131.601	16.3387	-45.2107
-19.0066	-169.743	19.1297	-126.106	15.5228	-43.6374
-18.4361	-164.528	18.4816	-122.089	15.1055	-42.4387
-17.8313	-158.125	17.9472	-116.728	14.7612	-41.397
-17.228	-151.082	17.0176	-110.933	14.2636	-40.149
-16.6153	-144.63	16.5721	-106.982	14.0265	-37.6489
-15.9853	-137.778	16.2222	-102.046	13.5963	-35.7313
-15.4423	-132.355	15.7865	-97.5865	12.9234	-34.7682
-14.7952	-124.408	14.8533	-92.6354	12.532	-31.7726
-14.2474	-118.463	14.2534	-86.6045	12.1759	-31.8586
-13.6856	-113.428	13.9289	-82.9308	11.7458	-30.4969
-13.0087	-104.509	13.3357	-77.458	11.3198	-27.051
-12.4641	-99.4293	12.6874	-73.2247	10.913	-26.2046
-11.8134	-92.7231	12.149	-69.3795	10.2958	-23.3435
-11.2269	-86.5128	11.631	-63.7657	10.0916	-22.747
-10.6369	-80.4703	11.0783	-60.3667	9.80651	-20.1036
-10.0235	-74.7681	10.6887	-55.6888	9.24331	-19.0793
-9.43658	-68.1198	9.93452	-50.9978	8.99379	-17.122
-8.85479	-62.8021	9.78177	-45.4261	8.72104	-17.376
-8.24053	-56.3095	8.87453	-41.671	8.21334	-14.6385
-7.65522	-51.1826	8.55882	-36.2709	7.80172	-14.9117
-6.9854	-45.7031	7.87566	-31.0291	7.27708	-14.674
-6.42004	-38.5483	7.48531	-27.1461	7.06795	-11.4022
-5.81908	-31.5063	7.16111	-23.8081	6.91547	-7.69828
-5.22203	-27.0966	6.63564	-17.2526	6.59106	-9.84395
-4.62185	-18.9606	6.28893	-14.8795	6.26021	-4.08107
-4.02402	-15.6509	6.17726	-10.3861	5.88552	-5.26479
-3.41836	-9.66187	5.83207	-3.66066	5.57671	-6.00121
-2.78649	-2.9541	5.38431	-0.55513	5.52129	-2.39897
-2.22465	4.80804	5.3701	4.38872	5.10371	0.419326
-1.64951	8.77228	5.24854	9.16109	4.95007	-0.388808
-1.03056	12.9974	5.45063	12.9627	4.94518	0.034732
-0.430376	20.0043	5.23997	17.2221	4.91029	2.78219
0.151414	25.6897	5.17821	20.9612	5.17043	4.72848
0.774286	30.6976	5.39862	25.0491	5.1419	5.64851
1.31969	37.3245	5.75373	31.0335	4.91798	6.29105
1.9543	42.0883	5.81232	33.1348	4.85112	8.95349
2.55643	48.7976	5.97887	38.4085	5.27623	10.3891
3.17578	52.4216	6.42564	43.1882	5.10559	9.23338
3.75171	58.5556	6.49447	46.9782	5.29205	11.5774
4.32919	64.2273	7.00517	51.287	5.58499	12.9403
4.97671	69.3512	7.48669	56.2119	6.04088	13.1393
5.56398	74.6872	7.70199	58.1316	6.19413	16.5556
6.17316	79.6081	7.99784	63.5856	6.02531	16.0226
6.75377	86.1359	8.59461	67.4802	6.72218	18.6557
7.34065	90.5334	9.13921	70.0364	6.85364	20.4971
7.9823	96.8704	9.50935	74.8117	6.85121	22.0588
8.55627	101.219	10.1828	80.02	7.55711	21.1992
9.17523	106.491	10.3474	83.6923	7.67045	22.7988
9.7801	111.374	10.8365	88.0418	7.86515	23.3321
10.358	116.606	11.0167	92.7182	8.44485	23.8879
10.9781	121.51	11.7877	95.8208	8.6225	25.6895
11.5529	127.866	12.3492	98.9656	8.95922	28.9
12.1648	131.816	12.5354	103.442	9.29533	28.3746
12.7544	136.209	13.1316	107.935	9.93852	28.2742
13.3972	141.985	13.6029	112.088	10.1471	29.8964
13.9704	146.582	13.8957	116.079	10.5174	30.5033
14.5549	152.08	14.5165	119.306	11.0105	32.7735
15.1798	155.769	15.0253	123.968	11.2167	31.8011
15.7952	161.896	15.5184	126.594	11.6824	35.3016
16.3124	165.793	16.09	132.398	11.8697	33.3945
16.9928	170.012	16.6941	134.567	12.3227	35.4454
17.5703	174.203	16.5939	137.743	12.8346	36.4602
18.1658	180.284	17.1931	142.271	12.8147	38.0126
18.7875	184.341	17.5326	145.406	13.3275	38.9353
19.3388	189.217	18.3458	149.289	13.747	39.9275
19.9573	193.703	18.5867	152.993	14.3174	40.7094
20.5583	197.83	19.068	157.046	14.3964	40.7838
21.1467	202.267	19.661	160.886	15.06	41.3817
21.7391	208.171	20.2762	164.096	15.1717	44.0752
22.3506	210.985	20.5462	167.703	15.5575	43.282
22.9621	215.831	20.9199	173.216	15.924	42.6147
23.5791	219.766	21.4099	175.89	16.1697	43.876
24.1547	225.661	21.9083	179.897	16.4666	45.7639
24.7443	228.897	22.2125	182.433	16.9306	46.4645
25.3519	233.211	22.6964	186.227	17.4124	46.9838
25.9779	237.996	23.2157	189.516	17.6198	48.4803
26.5597	241.695	23.6338	193.365	18.1557	48.3295
27.1739	245.36	24.0438	196.674	18.4857	48.6856
27.7616	251.004	24.3828	201.355	18.6688	49.649
28.3528	253.86	24.9014	204.596	19.3583	49.2648
28.9643	258.873	25.3811	208.309	20.174	50.5644
29.5578	263.792	25.8849	211.947	20.2277	51.8449
30.1678	267.705	26.0914	215.383	20.4858	52.3219
30.75	270.248	26.6009	218.592	21.0417	51.6568
31.3756	275.925	26.8992	221.685	21.3173	54.2392
31.9629	279.604	27.6104	226.129	21.6005	53.4741
32.5177	282.954	27.7287	229.719	22.0356	53.2355
33.1613	287.241	28.1886	232.495	22.0451	54.7461
33.7239	291.559	28.7732	235.551	22.4265	56.0082
34.3671	295.958	29.0852	239.964	23.0623	55.9939
34.9446	298.828	29.3438	242.991	23.2421	55.837
35.551	303.577	29.8949	247.216	23.9873	56.361
36.1312	307.843	30.2563	251.048	24.1954	56.7952
36.7389	311.291	30.746	252.813	24.6097	58.4781
37.3312	315.547	31.2963	257.023	24.7506	58.5238
37.9431	318.86	31.5925	261.852	25.3377	57.0074
38.5081	321.915	31.7866	264.215	25.4465	57.6993
39.1795	326.199	31.9406	267.132	26.0095	59.0674
39.7186	330.966	32.803	271.881	25.846	59.0851
40.338	334.798	32.858	273.936	27.1136	60.8617
40.962	338.107	33.6005	278.745	27.1283	59.3626
41.5571	341.02	34.0472	281.658	27.3346	59.3618
42.1589	346.033	34.5937	285.861	28.0843	60.1717
42.7293	350.2	35.0775	289.279	28.3916	60.9209
43.3584	353.7	35.3829	292.242	28.8397	61.4581
43.9614	356.79	35.5077	295.856	29.2875	60.9339
44.5619	360.15	36.0827	299.572	29.8881	60.578
45.1148	363.965	36.2078	302.064	30.0296	61.9004
45.7325	368.492	36.7125	304.831	30.4854	63.6608
46.3918	371.7	37.1816	309.076	30.5795	62.6233
46.929	375.2	37.7352	312.905	31.1504	62.2944
47.4983	378.696	37.8679	315.54	31.5248	63.1555
48.1383	383.395	38.6406	320.551	31.7374	62.8446
48.7385	387.1	39.093	325.096	32.2188	62.0037
49.3743	391.56	39.2431	327.994	32.4844	63.5662
49.9271	396.24	39.1011	331.95	33.0753	64.2904
50.5735	399.461	39.9211	337.131	33.2378	62.3308
51.1342	403.194	40.3976	338.26	33.9742	64.9339
51.7187	406.543	40.9903	341.576	34.0973	64.967
52.3646	410.747	41.2146	344.891	34.61	65.856
52.9425	413.985	41.3541	349.409	34.71	64.5758
53.5447	419.963	41.8398	355.015	35.3678	64.9477
54.1675	423.573	42.4234	355.979	35.9618	67.5945
54.7184	425.975	42.7903	359.802	36.0601	66.1728
55.3495	431.143	42.9407	364.474	36.7435	66.6688
55.9395	435.126	43.6576	366.778	37.2755	68.348
56.5475	439.593	44.0622	371.608	37.8781	67.9853
57.1418	443.84	44.5389	375.568	38.0073	68.2718
57.6935	446.132	44.8488	380.468	38.4202	65.6634
58.3692	451.036	45.1494	383.551	38.9827	67.4853
58.9322	455.376	45.6334	386.384	39.3812	68.9912
59.5758	459.357	46.1661	391.593	39.7921	67.7638
60.1267	462.547	46.4979	395.944	39.8992	66.6035
60.7425	467.003	46.6015	398.623	40.5307	68.3794
61.3842	471.506	47.2679	403.326	40.7245	68.1796
61.9429	475.761	47.8347	406.1	41.6735	69.6611
62.5892	481.111	48.331	411.073	41.6923	70.0379
63.1463	483.876	48.6777	414.764	42.5255	69.1116
63.7105	488.367	49.6852	419.034	42.7295	69.3327
64.3714	491.988	49.5386	423.899	43.6269	68.0883
64.907	497.057	50.0293	428.73	44.0625	68.3267
65.5173	501.462	50.0035	431.331	44.2218	70.1307
66.1003	506.976	51.0821	437.369	44.7529	69.6071
66.7149	511.71	51.4742	441.374	45.0481	70.3353
67.3359	514.407	51.5921	446.266	45.1859	68.1415
67.9184	520.735	52.0295	451.739	45.958	68.9965
68.5323	524.693	52.36	456.432	46.4142	68.2608
69.1364	530.167	53.4344	459.364	47.1156	70.803
69.7201	533.823	53.7584	464.912	47.7392	68.9106
70.3368	540.21	54.0481	469.91	48.2182	70.3003
70.9248	544.229	55.0116	473.716	48.6215	70.5135
71.5402	549.562	54.9821	479.544	48.7978	70.0176
72.1142	554.549	55.653	483.321	49.233	71.2272
72.7206	559.465	55.9732	489.434	49.565	70.0314
73.3103	564.583	56.6676	493.519	49.9928	71.0642
73.9147	570.818	56.9105	498.644	50.5084	72.1734
74.5353	576.007	57.2639	502.206	51.0666	73.8011
75.1221	580.821	57.7781	507.597	51.7801	73.2238
75.7442	585.396	58.3854	513.944	52.5472	71.4522
76.3311	589.981	59.0156	518.994	52.8945	70.9875
76.954	596.848	59.4115	524.004	53.2657	72.8433
77.5397	601.044	59.9278	527.57	54.1185	73.4732
78.1273	607.57	60.3913	533.386	54.6041	74.1837
78.7518	614.198	60.848	539.635	55.0018	74.5632
79.3347	620.099	61.1883	545.541	55.1305	74.5579
79.931	625.27	61.6974	552.868	55.3355	72.402
80.5081	630.243	62.2298	557.578	55.8066	72.665
81.138	638.568	63.1506	563.241	56.6795	75.327
81.7499	642.966	63.7255	569.326	57.3025	73.6399
82.3149	649.661	64.3726	574.387	57.8428	75.2739
82.9335	656.218	64.8949	580.162	58.1914	76.0555
83.5	662.651	65.6713	587.206	58.6383	75.4449
84.0982	669.485	66.1359	594.038	59.1229	75.4477
84.7152	675.334	66.9558	598.842	59.597	76.4921
85.3095	683.174	67.5648	606.976	60.8466	76.1984
85.9316	687.138	67.6018	609.949	61.1547	77.1893
86.5498	697.957	68.5698	619.081	61.8642	78.8758
87.1308	702.289	68.8446	624.961	62.6391	77.3281
87.7459	708.868	69.2789	630.668	63.2043	78.2009
88.3527	717.439	70.2403	635.941	63.3675	81.498
88.9544	726.915	71.2447	645.053	63.9541	81.862
89.4979	734.84	72.0904	650.516	64.6023	84.3248
90.1012	737.608	72.2563	657.957	65.297	79.6508
90.7475	746.942	72.4479	665.34	66.0214	81.6023
91.3552	753.352	73.2997	672.077	66.3319	81.2754
91.9291	763.745	74.6595	678.189	66.7097	85.5559
92.505	769.665	74.993	686.128	67.053	83.5374
93.1146	776.292	75.7063	693.096	68.171	83.1961
93.7324	787.494	76.5305	701.115	68.9337	86.3787
94.358	794.366	77.4367	708.508	69.6359	85.8587
94.8999	803.74	78.058	715.692	70.4615	88.0475
95.4903	812.683	78.9917	723.485	70.531	89.1985
96.0893	820.441	79.4809	730.931	71.5209	89.5098
96.7204	830.165	79.631	739.219	71.9972	90.9465
97.3104	838.499	81.0384	748.484	72.5138	90.0152
97.884	848.573	81.6188	756.17	73.3282	92.4029
98.4873	857.161	82.2782	765.362	74.0495	91.799
99.1051	865.982	82.7267	773.096	74.6635	92.8861
99.6908	874.776	83.544	784.087	75.4396	90.689
100.326	883.575	84.3904	792.948	76.0473	90.627
100.874	894.839	85.3823	800.414	76.7466	94.4259
101.49	905.313	86.1947	809.021	77.5967	96.2921
102.089	915.802	87.1744	819.08	77.9652	96.7218
102.665	925.218	88.0389	828.321	79.0681	96.897
103.339	933.964	88.5998	836.857	79.7065	97.1071
103.921	945.747	89.5689	844.972	80.5752	100.775
104.483	957.318	90.2232	856.114	81.1727	101.204
105.075	968.764	91.4377	864.345	81.8245	104.419
105.702	979.538	91.866	873.614	82.7057	105.924
106.287	991.942	93.0764	884.702	83.5579	107.24
106.911	1002.65	93.7291	896.096	84.781	106.559
107.489	1012.07	94.6164	904.633	84.6737	107.439
108.096	1026.32	96.177	917.807	85.5237	108.514
108.688	1038.13	96.7872	927.493	86.0951	110.639
109.321	1051.34	98.0066	939.087	87.3011	112.254
109.932	1063.34	98.9888	948.515	88.056	114.828
110.506	1073.72	99.3557	962.968	89.352	110.757
111.09	1087.34	101.223	970.024	90.2624	117.312
111.705	1104.25	102.157	984.535	91.208	119.712
112.318	1116.45	103.34	996.025	91.9401	120.424
112.913	1129.77	104.301	1005.38	92.8491	124.399
113.47	1143.6	105.392	1018.17	94.1889	125.438
114.074	1156.63	106.594	1034.6	94.6623	122.03
114.716	1170.13	107.388	1045.25	95.3803	124.883
115.283	1184.54	108.527	1058.63	95.3823	125.908
115.889	1199.42	109.812	1070.64	96.4354	128.776
116.519	1216.98	110.42	1084.49	98.0282	132.49
117.093	1229.4	111.504	1098.85	99.2516	130.55
117.695	1244.18	112.998	1111.42	99.8631	132.765
118.292	1262.71	114.107	1124.82	100.362	137.889
118.898	1276.25	115.107	1140.03	101.071	136.221
119.438	1291.56	116.231	1155.21	102.413	136.354

## Sheet: Fig 4B
380 nm								535 nm
0.1	0.3	1	3	10	30	100		0.1	0.3	1	3	10	30	100
91.4458	89.7703	88.2503	72.8862	62.5052	52.1289	50.3669		76.3975	70.6309	79.0707	66.6063	56.7217	51.6567	46.0125
94.0857	89.5384	83.6638	67.0419	48.0309	38.209	29.7122		82.4211	78.7024	75.3663	60.2938	43.3287	36.0249	30.3174
97.9232	94.3261	94.9481	87.5461	73.1975	53.2989	50.5693		87.3109	83.6372	84.343	77.6123	66.5059	50.3214	50.2612
94.4714	93.9554	89.122	78.1197	64.3566	57.3361	53.2086		82.4343	82.4351	77.8571	70.1235	59.4358	53.853	52.4866
97.5859	95.937	92.4022	82.4821	68.2994	62.6157	63.6096		82.0663	81.7743	81.3646	74.8622	64.0037	60.7332	63.8259
97.9605	97.474	94.4959	87.2415	68.2346	60.5757	58.4238		82.7426	81.8398	79.8885	73.5893	59.3805	57.4213	57.5141
