# Supplementary material for: Probing the ionotropic activity of glutamate GluD2 receptor in HEK cells with genetically-engineered photopharmacology
Source: eLife. 2020 Oct 28;9:e59026. doi: 10.7554/eLife.59026 (PMC7679134; doi:10.7554/eLife.59026)
Supplement: Figure 5—source data 1. [file elife-59026-fig5-data1.xlsx]

## Sheet: Fig 5C
% Block I677C	% Block WT
17.1715	15.8365
18.4398	5.51606
15.3281	21.9163
38.5547	7.14432
37.218	-16.8632
22.7833	-13.8573
0.224789
32.5057
22.7782	3.28211	Mean
4.56393	6.38839	SEM
8	6	N
0.5744	0.4488	Normality test shapiro
			VAR	0.6199	true
			t-test WT-I677C	p = 0.03324
			t-test var=true	0.02511

## Sheet: Fig 5D
I380/dark I677C	I380/dark WT
1.0852	1.01251
1.08568	1.01484
1.08503	1.02261
1.11575	1.01365
1.07586	0.987556
1.10739	0.992607
1.08734	1.00473
1.10076	1.03879
1.09288	1.01091	Mean
0.00479711	0.00576086	SEM
8	8	N
0.2809	0.8469	Normality test shapiro
2.445e-07	0.1001	t-test (different from 1)
